# Supplementary material for: Structural and fluorescent regulation of Cd(ii) coordination polymers with homoterephthalate by N-donor second ligands
Source: Royal Society of Chemistry journal article supplement (doi:10.1039/c3ce26781d), 2013-01-01
Supplement: c3ce26781d.pdf [file c3ce26781d.pdf]

## Supplementary information for

# Structural and fluorescent regulation of Cd(II) coordination polymers with homoterephthalate by N-donor second ligands

Guang-Zhen Liu<sup>a</sup>, Xiao-Dong Li<sup>a</sup>, Xiao-Ling Li<sup>a</sup>, and Li-Ya Wang<sup>\*a,b</sup>

<sup>†</sup>*College of Chemistry and Chemical Engineering, Luoyang Normal University, Luoyang, Henan, 471022, P. R. China*

<sup>‡</sup>*College of Chemistry and Pharmacy Engineering, Nanyang Normal University, Nanyang, Henan, 473061, P. R. China*

\*Corresponding authors. Fax: +86-379-65511205; Tel: +86-0379-65523593; E-mail:

[wlya@lynu.edu.cn](mailto:wlya@lynu.edu.cn)

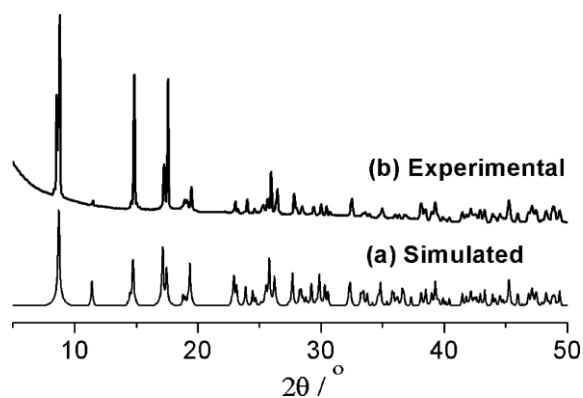

**Figure S1** The experimental and simulated PXRD patterns for complex 1.

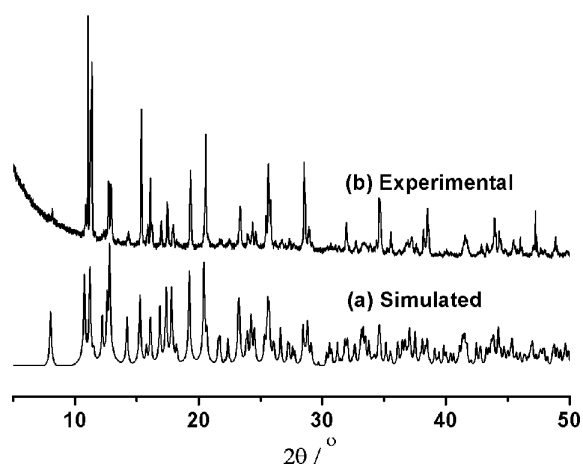

**Figure S2** The experimental and simulated PXR D patterns for complex 2.

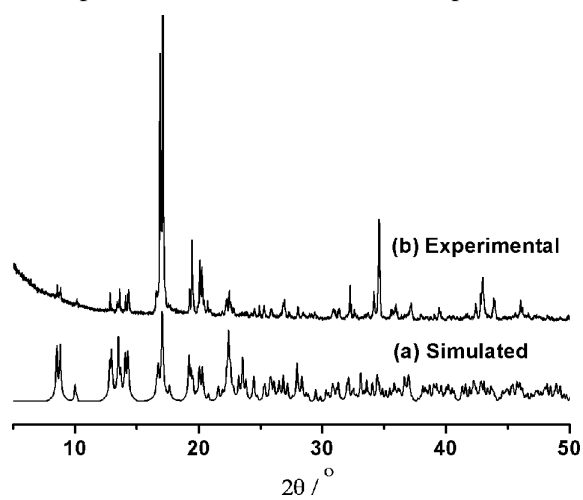

**Figure S3** The experimental and simulated PXR D patterns for complex 3.

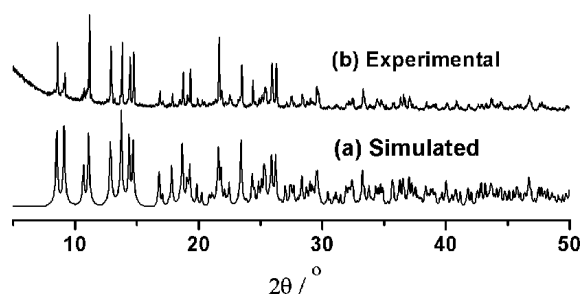

**Figure S4** The experimental and simulated PXR D patterns for complex 4.

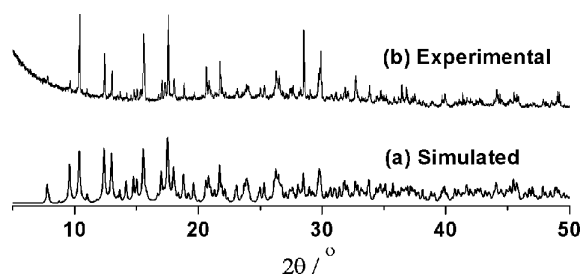

**Figure S5** The experimental and simulated PXR D patterns for complex 5.
